# Supplementary material
Source: publisher figshare collection journal article supplement (https://diabetesjournals.figshare.com/ndownloader/files/31620035)
Supplement: Supplementary file 1 [file 31620035]

## Sheet: Sheet1
Supplementary table 1- Antibodies
	Primary Antibodies	Source	Product Number	Species	Dilution Factor
1	Anti insulin	Dako	A0564-discontinued	Guinea pig polyclonal	1/200 (FC)
2	Anti insulin	Agilent Technologies	IR0026	Guinea pig polyclonal	1/10 (IF)
3	Anti LC3B	Cell Signaling Technology	2775	Rabbit polyclonal	1/200 (IF)
3	Anti pS6 (Ser240/244) (D68F8)	Cell Signaling Technology	5364	Rabbit monoclonal	1/200 (IF), 1/300(FC) 1/1000-4000 (WB)
4	Anti S6 Ribossomal Protein (5G10)	Cell Signaling Technology	2217	Rabbit monoclonal	1/1000 (WB)
5	Anti S6 Ribossomal Protein (54D2)	Cell Signaling Technology	2317	Mouse monoclonal	1/1000 (WB on human samples)
6	Anti LAMP1	Abcam	24170	Rabbit Polyclonal	1/200 (IF),
7	Anti pTFEB (Ser122)	Cell Signaling Technology	86843	Rabbit Polyclonal	1/500-1000 (WB)
8	Anti TFEB	Bethyl Laboratories	A303-673A	Rabbit Polyclonal	1/200 (IF),1/1000 (WB)
9	Anti TFEB (D207D)	Cell Signaling Technology	37785	Rabbit monoclonal	1/1000 (WB on human samples)
10	Anti GFP	Abcam	6673	Goat Polyclonal	1/200 (IF)
11	Anti P62/SQSTM1	Cell Signaling Technology	5114	Rabbit polyclonal	1/1000 (WB)
12	Anti ATG7 (D12B11)	Cell Signaling Technology	8558	Rabbit monoclonal	1/1000 (WB)
13	Anti pULK1 (Ser757) (D7O6U)	Cell Signaling Technology	14202	Rabbit monoclonal	1/1000 (WB)
14	Anti pULK1 (Ser757)	Cell Signaling Technology	6888	Rabbit polyclonal	1/500 (WB)
15	Anti ULK1 (D8H5)	Cell Signaling Technology	8054	Rabbit monoclonal	1/1000 (WB)
16	Anti P-4E-BP1 (Thr37/46) (236B4)	Cell Signaling Technology	2855	Rabbit monoclonal	1/1000 (WB )
17	Anti 4E-BP1 (53H11)	Cell Signaling Technology	9644	Rabbit monoclonal	1/1000 (WB )
18	Anti Raptor (24C12)	Cell Signaling Technology	2280	Rabbit monoclonal	1/1000 (WB)
19	Anti S6K	Cell Signaling Technology	9202	Rabbit polyclonal	1/1000 (WB)
20	Anti TSC1(D43E2)	Cell Signaling Technology	6935	Rabbit monoclonal	1/1000 (WB)
21	Anti GAPDH (6C5)	Abcam	8245	Mouse monoclonal	1/1000 (WB)
22	Anti Tubulin (4D1)	Abcam	56676	Mouse monoclonal	1/1000 (WB)
23	Anti-aTubulin	Sigma	T5168	Mouse monoclonal	1/4000 (WB on human samples)
	Secondary Antibodies	Source	Product Number	Species	Dilution Factor
	Cy5-conjugated Affinipure IgG	Jackson ImmunoResearch	711-175-152	Donkey anti Rabbit	1/200 (IF, FC)
	Alexa Fluor 647- conjugated AffiniPure IgG	Jackson ImmunoResearch	111714	Donkey anti Goat	1/200 (IF)
	Cy3-conjugated Affinipure IgG	Jackson ImmunoResearch	715-165-151	Donkey anti Mouse	1/200 (IF)
	Cy3-conjugated Affinitypure IgG	Jackson ImmunoResearch	711-165-152	Donkey anti Rabbit	1/200 (IF)
	Alexa Fluor 488-Conjugated IgG	Jackson ImmunoResearch	706-545-148	Donkey anti Guinea Pig	1/200 (IF, FC)
	Peroxidase-conjugated AffiniPure IgG	Jackson ImmunoResearch	111-035-003	Goat anti Rabbit	1/4000 (WB)
	Peroxidase-conjugated AffiniPure IgG	Jackson ImmunoResearch	115-035-003	Goat anti Mouse	1/4000 (WB)
	IR-Dye 800CW	LI-COR	925-32213	Donkey anti Rabbit	1/8000 (WB on human samples)
	IR-Dye 680RD	LI-COR	925-68070	Goat anti Mouse	1/8000 (WB on human samples)
IF- Immunoflurescence		WB- Western blot	FC- Flow cytometry
